# Supplementary material for: Shikonin delivery strategy through alkali-crosslinked polyvinyl alcohol hydrogel promotes effective wound healing
Source: Royal Society of Chemistry journal article supplement (doi:10.1039/d3nj05176e), 2024-01-01
Supplement: d3nj05176e1.pdf [file d3nj05176e1.pdf]

## Supporting information

### **Shikonin delivery strategy through alkali-crosslinked polyvinyl alcohol hydrogel promotes effective wound healing**

Peng Wang<sup>2‡</sup>, Fanghao Zheng<sup>1‡</sup>, Min Guo<sup>2</sup>, Kaijun Lei<sup>1</sup>, Zixue Jiao<sup>2</sup>, Zihong Li<sup>1</sup>, Huaiguo Li<sup>1</sup>, Dongwen Liu<sup>1</sup>, Mingfeng He<sup>1\*</sup>, Zongliang Wang<sup>2\*</sup>, and Peibiao Zhang<sup>2\*</sup>

<sup>1</sup> Foshan Hospital of Traditional Chinese Medicine, Foshan 528000, China

<sup>2</sup> Key Laboratory of Polymer Ecomaterials, Changchun Institute of Applied Chemistry, Chinese Academy of Sciences, Changchun 130022, China

#### **Corresponding authors:**

Mingfeng He, hemingfengfs@163.com;

Zongliang Wang, wangzl@ciac.ac.cn;

Peibiao Zhang, zhangpb@ciac.ac.cn.

‡ These authors contributed equally to this work.

### **1. The effect of NaOH concentration on the loading efficiency of SHK**

The PVA membranes ( $\sim 20$  mg per piece) were immersed in a 20 mL SHK/NaOH solution ( $320 \mu\text{M}$ ) with NaOH concentrations of 0.1, 1, 3, 6, and 9 M, respectively, for 30 min. The obtained SHK/PVA hydrogels were taken out and the water on the surface was wiped off with filter paper. The SHK/PVA hydrogels were continually washed until neutral. The SHK in the SHK/PVA hydrogels was dissolved using DMSO and its absorbance was measured at 520 nm using a UV spectrophotometer ( $n=4$ ).

### **2. The effect of immersion time on the loading efficiency of SHK**

The PVA membranes ( $\sim 20$  mg per piece) were immersed in a 20 mL SHK/NaOH solution (SHK:  $320 \mu\text{M}$ , NaOH: 6 M) for 10, 30, 60, 120, 240, 480, and 2880 min, respectively. The obtained SHK/PVA hydrogels were taken out and the water on the surface was wiped off with filter paper. The SHK/PVA hydrogels were continually washed until neutral. The SHK in the SHK/PVA hydrogels was dissolved using DMSO and its absorbance was measured at 520 nm using a UV spectrophotometer ( $n=4$ ).

### **3. SHK absorption of PVA membrane in different solutions**

The PVA membranes ( $\sim 20$  mg per piece) were separately immersed in deionized water, 6M NaOH solution, and  $320 \mu\text{M}$  SHK in 6M NaOH solution for 2880 min, respectively. After taking out and wiped with filter paper, the formed PVA or SHK/PVA hydrogels were washed with deionized water until neutral and weighed. The PVA or SHK/PVA hydrogels were placed in an oven at  $37^\circ\text{C}$ , and the weight of all the samples was recorded before and after drying for 15, 30, 45, 60, 90, 120, 180, 240, 360, 480, 720, and 1440 min, respectively ( $n=4$ ).

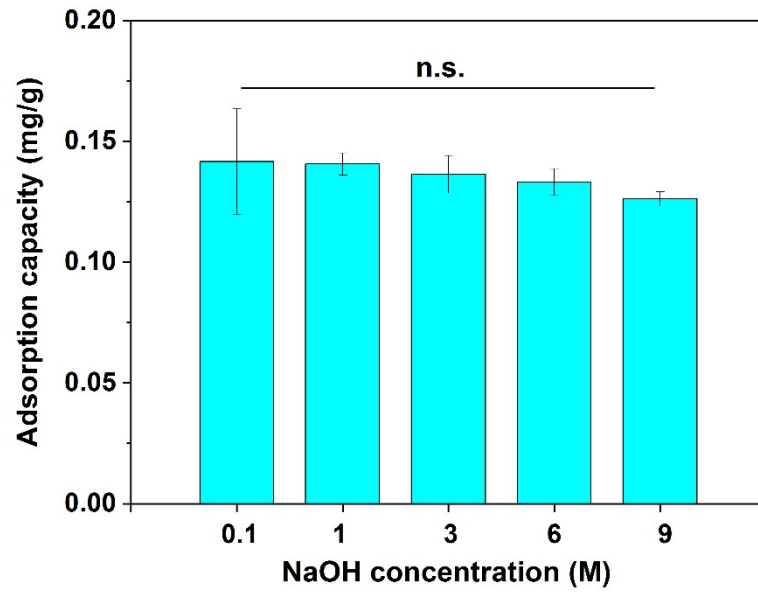

Figure S1. The effect of NaOH concentration (0.1 to 9 M) on the loading efficiency of SHK in the SHK/PVA hydrogels (n=4, n.s. indicates no significant statistical difference).

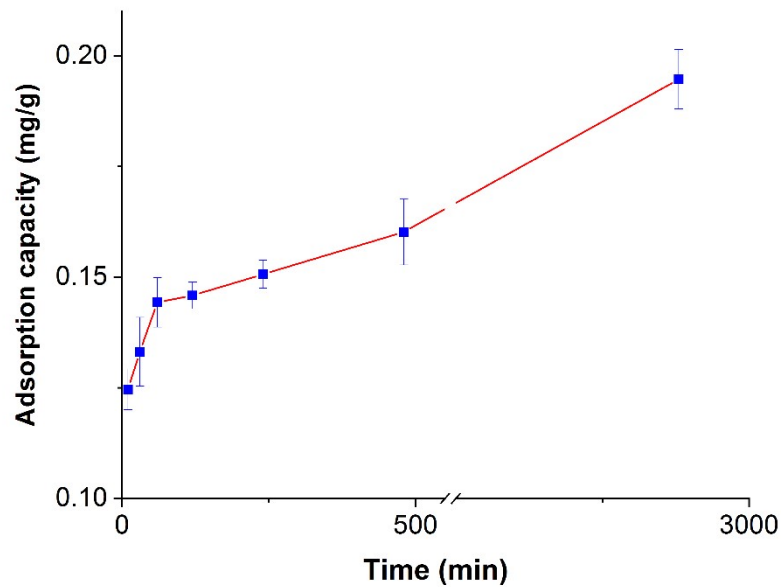

Figure S2. The effect of immersing time (10 to 2880 min) on the loading efficiency of SHK in the SHK/PVA hydrogels (n=4).

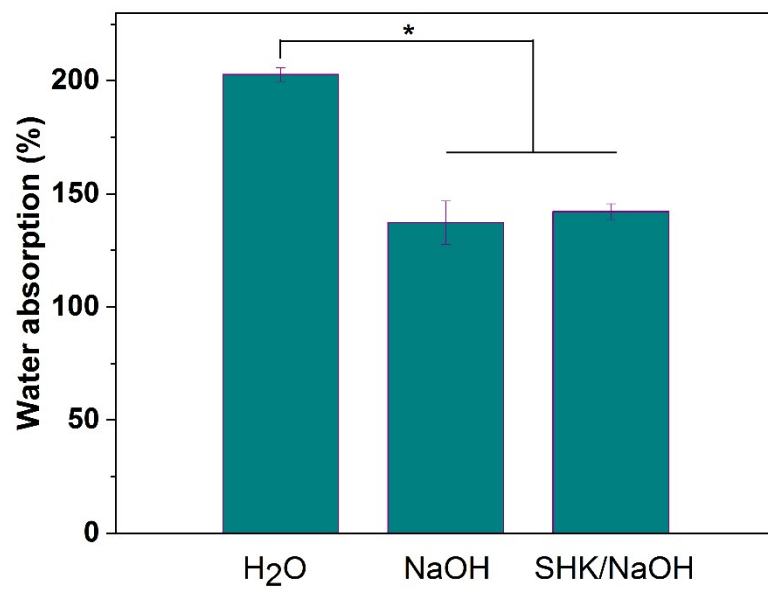

Figure S3. Water absorption of PVA membranes in different solutions (n=4).

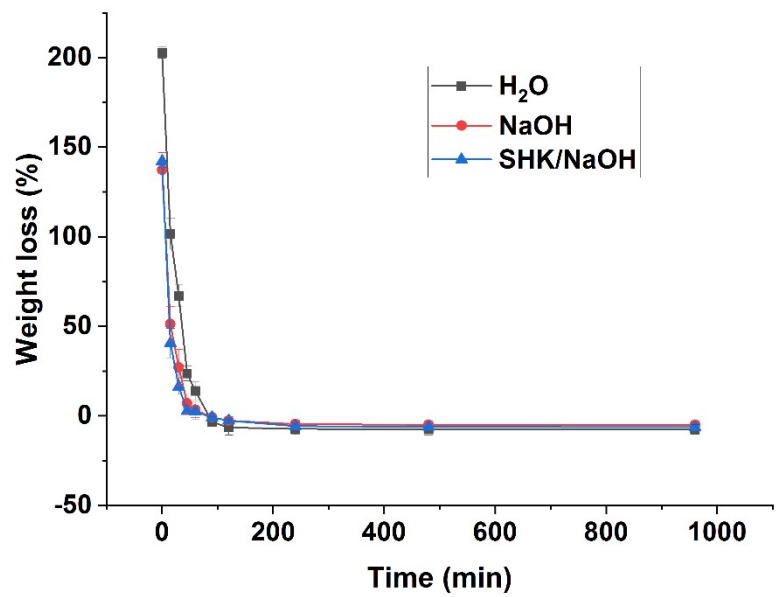

Figure S4. Water loss of PVA or SHK/PVA hydrogels at 37 °C for 15 to 1440 min.
